# Supplementary material for: A Signature Predicting Poor Prognosis in Gastric and Ovarian Cancer Represents a Coordinated Macrophage and Stromal Response
Source: Oxford University Press journal article supplement (doi:10.1158/1078-0432.ccr-13-3049), 2014-03-22
Supplement: 10780432ccr133049-sup-tab6.xls [file 10780432ccr133049-sup-tab6.xls]

## Sheet: Sheet1
	Table S6: Compartmental locations of cluster 27 genes in GC and OVCA
		Gene symbol	Location in gastric	Location in ovarian		Gene symbol	Location in gastric	Location in ovarian
	1	SPARC	Stroma	Stroma	51	COL5A1	Stroma	Stroma
	2	CCND2	Both	Stroma	52	KIAA1199	Both	Stroma
	3	THBS1	Stroma	Stroma	53	OLFML2B	Both	Stroma
	4	GPNMB	Stroma	Stroma	54	RIS1	Both	Stroma
	5	BGN	Stroma	Stroma	55	LPPR4	Both	Stroma
	6	COL6A3	Stroma	Stroma	56	OSR2	Both	Both
	7	TIMP1	Both	Both	57	BGN /// TSHZ1	Stroma	Stroma
	8	MEST	Epithelial	Both	58	TWIST1	Both	Stroma
	9	NNMT	Both	Stroma	59	MSR1	Stroma	Stroma
	10	COL1A1	Stroma	Stroma	60	LOX	Both	Stroma
	11	COL1A2	Stroma	Stroma	61	HHEX	Both	Both
	12	C11orf43	Both	Both	62	RAB31	Stroma	Stroma
	13	THBS2	Stroma	Stroma	63	C3 /// LOC653879	Both	Both
	14	IFIT1	Both	Both	64	LIPG	Both	Both
	15	APOE	Both	Both	65	CD177	Both	Both
	16	MFAP2	Both	Both	66	DKK2	Both	Stroma
	17	DFNA5	Both	Stroma	67	SLC19A3	Both	Both
	18	DIO2	Stroma	Stroma	68	LEF1	Stroma	Stroma
	19	VCAM1	Stroma	Stroma	69	GDF15	Epithelial	Both
	20	SFRP4	Stroma	Stroma	70	COL5A2	Stroma	Stroma
	21	NID2	Both	Stroma	71	RARRES1	Both	Both
	22	IFI6	Both	Both	72	AMIGO2	Both	Both
	23	APOC1	Both	Both	73	TMEPAI	Both	Both
	24	IFI44L	Both	Both	74	CLDN1	Both	Epithelial
	25	EDNRA	Stroma	Stroma	75	ZNF703	Both	Both
	26	CSPG2	Stroma	Stroma	76	GPR34	Both	Stroma
	27	MSLN	Both	Both	77	SUCNR1	Both	Both
	28	TNFRSF11B	Both	Both	78	MS4A7	Stroma	Stroma
	29	NEB	Both	Both	79	H19	Both	Both
	30	KRT17	Both	Epithelial	80	SULF2	Both	Stroma
	31	KAL1	Stroma	Stroma	81	---	Both	Both
	32	ISG15	Both	Both	82	LOC91461	Both	Both
	33	COL10A1	Stroma	Stroma	83	COL12A1	Stroma	Stroma
	34	WNT5A	Both	Both	84	CTHRC1	Stroma	Stroma
	35	CST1	Both	Both	85	FAM83D	Both	Epithelial
	36	CDH11	Stroma	Stroma	86	JUB	Both	Both
	37	TNFSF4	Stroma	Stroma	87	COL8A1	Stroma	Stroma
	38	AQP1	Both	Stroma	88	CD109	Stroma	Both
	39	THY1	Stroma	Stroma	89	PRRX1	Stroma	Stroma
	40	TFPI2	Both	Both	90	IFIT2	Both	Both
	41	EPHB2	Both	Both	91	FNDC1	Stroma	Stroma
	42	PNMA2	Both	Both	92	HNT	Stroma	Stroma
	43	FAP	Both	Stroma	93	HOXB3	Both	Stroma
	44	OLR1	Both	Stroma	94	PI15	Both	Both
	45	PLA2G4A	Both	Both	95	F2RL2	Stroma	Both
	46	FN1	Stroma	Stroma	96	RASGEF1A	Both	Epithelial
	47	INHBA	Stroma	Stroma	97	LOC440157	Both	Both
	48	COL4A1	Stroma	Stroma	98	COL3A1	Stroma	Stroma
	49	SERPINE2	Both	Both	99	KIAA1913	Both	Stroma
	50	SULF1	Stroma	Stroma	100	LOC339751	Both	Both
